# Supplementary material for: Interrogating the photogenerated Ir(iv) state of a water oxidation catalyst using ultrafast optical and X-ray absorption spectroscopy
Source: Royal Society of Chemistry journal article supplement (doi:10.1039/c3sc51511g), 2013-01-01
Supplement: c3sc51511g.pdf [file c3sc51511g.pdf]

Electronic Supplementary Information for

**Interrogating the Photogenerated Ir(IV) State of a Water Oxidation Catalyst using  
Ultrafast Optical and X-ray Absorption Spectroscopy**

Michael T. Vagnini<sup>a</sup>, Michael W. Mara<sup>a,b</sup>, Michael R. Harpham<sup>b</sup>, Jier Huang<sup>b</sup>, Megan L. Shelby<sup>a,b</sup>, Lin X. Chen<sup>a,b</sup>, and Michael R. Wasielewski<sup>a\*</sup>

<sup>a</sup>*Department of Chemistry and Argonne-Northwestern Solar Energy Research (ANSER) Center,  
Northwestern University, Evanston, IL 60208*

<sup>b</sup>*Chemical Sciences and Engineering Division, Argonne National Laboratory, 9700 South Cass  
Avenue, Argonne, IL 60439*

E-mail: m-wasielewski@northwestern.edu

**Contents:**

- I. Experimental details
  - A. General
  - B. Synthesis
- II. Supporting figures
  - A. Steady-state spectroscopy of *N*-(3-pentyl)-PMI (**1**)
  - B. Spectroelectrochemistry of *N*-(3-pentyl)-PMI (**1**)
  - C. Transient absorption spectroscopy of NDI-PMI-Ir catalyst triad (**9**) in PhCN
  - D. Energy level diagram for NDI-PMI-Ir catalyst triad (**9**) in PhCN
  - E. Additional X-ray absorption difference spectra from TR-XAFS
- III. Supporting tables
- IV. References

## I. Experimental details

### A. General

All chemicals were obtained from commercial suppliers and used without further purification unless otherwise noted. Solvents for synthesis were ACS reagent grade, unless otherwise specified. Column chromatography was performed with standard grade silica gel (Sorbent Technologies, 60 Å, 32-63 µm) and alumina deactivated to Activity III (Sigma-Aldrich, activated, neutral, Brockmann I). CH<sub>2</sub>Cl<sub>2</sub> used in spectroscopy was dried using a GlassContour solvent system, and benzonitrile was distilled and further dried using activated alumina. <sup>1</sup>H and <sup>13</sup>C nuclear magnetic resonance spectra were recorded on a Bruker Avance III 500 MHz (with chemical shifts in ppm referenced to the solvent), and high resolution electrospray ionization (HR-ESI) mass spectra were recorded on an Agilent 6210 LC-TOF. Characterization studies were performed at the Integrated Molecular Structure Education and Research Center (IMSERC) at Northwestern University.

### B. Synthesis

Reagents 2-phenylpyridin-4-ylamine (**NH<sub>2</sub>-ppy**)<sup>1</sup>, [Cp\*IrCl<sub>2</sub>]<sub>2</sub><sup>2</sup>, *N*-(2,5-di-*tert*-butylphenyl)-naphthalene-1,8-dicarboxyanhydride-4,5-dicarboximide (**NIA**)<sup>3</sup>, and 3,5-di-*tert*-butylphenylboronic acid<sup>4</sup> were synthesized according to reported methods.

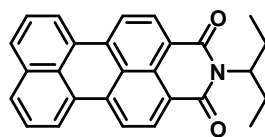

**PMI-C<sub>5</sub> (1)**

**PMI-C<sub>5</sub> (1).** Perylene-3,4:9,10-bis(dicarboxylic anhydride) (31.5 g, 80.3 mmol), 3-aminopentane (3.68 g, 4.92 mL, 42.3 mmol), zinc (II) acetate dihydrate (11.9 g, 54.1mmol), imidazole (161 g, 2.37 mol), and water (80 mL) were combined in a teflon sleeve and placed in a

high pressure autoclave. The vessel was sealed, and the temperature was gradually increased to 190 °C. After 24 h the heat was turned off and the reaction cooled to room temperature. The dark red-brown crude product was removed from the sleeve with 2 M HCl and vacuum filtered, and the product was extracted from the filter cakes by stirring the solid repeatedly in CHCl<sub>3</sub>. Column chromatography on silica was performed with CHCl<sub>3</sub> as the eluent, and first red band afforded the target product. Yield: 8.54 g (21.8 mmol, 27%). <sup>1</sup>H NMR (500 MHz, CDCl<sub>3</sub>) δ 8.48 (d, *J* = 7.9 Hz, 2H), 8.29 (d, *J* = 7.6 Hz, 2H), 8.25 (d, *J* = 8.0 Hz, 2H), 7.81 (d, *J* = 8.1 Hz, 2H), 7.54 (t, *J* = 7.8 Hz, 2H), 5.08 (tt, *J* = 9.5, 5.9 Hz, 1H), 2.28 (m, 2H), 1.96 (m, 2H), 0.94 (t, *J* = 7.4 Hz, 6H). <sup>13</sup>C NMR (125 MHz, CDCl<sub>3</sub>) δ 136.71, 134.17, 130.74, 129.80, 129.06, 127.77, 126.90, 126.46, 123.46, 120.00, 77.41, 77.36, 77.16, 76.91, 57.40, 25.17, 11.60. MS (ESI): *m/z* 392.163 [M+H]<sup>+</sup> (calculated 392.165).

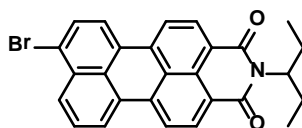

**Br-PMI-C<sub>5</sub> (2)**

**Br-PMI-C<sub>5</sub> (2).** PMI-C<sub>5</sub> (1) (2.00 g, 5.11 mmol) was dissolved in 400 mL CH<sub>2</sub>Cl<sub>2</sub> and heated to 40 °C under N<sub>2</sub>. Br<sub>2</sub> (0.26 mL, 5.1 mmol) was syringed in dropwise through the top of the condenser, and the solution was heated to reflux (50 °C) for 2 h. The solvent and bromine were evaporated off overnight, and the crude product was purified on a silica column with CHCl<sub>3</sub> as the eluent. Yield: 2.35 g (5.01 mmol, 98%). <sup>1</sup>H NMR (500 MHz, CDCl<sub>3</sub>) δ 8.56 (t, *J* = 7.8 Hz, 2H), 8.44 (d, *J* = 7.5 Hz, 1H), 8.40 (d, *J* = 8.3 Hz, 1H), 8.35 (d, *J* = 8.0 Hz, 1H), 8.28 (d, *J* = 8.4 Hz, 1H), 8.19 (d, *J* = 8.1 Hz, 1H), 7.88 (d, *J* = 8.1 Hz, 1H), 7.70 (t, *J* = 8.0 Hz, 1H), 5.08 (tt, *J* = 9.5, 5.9 Hz, 1H), 2.27 (m, 2H), 1.94 (m, 2H), 0.93 (t, *J* = 7.4 Hz, 6H). <sup>13</sup>C NMR (125 MHz, CDCl<sub>3</sub>) δ 136.34, 136.20, 133.00, 131.28, 130.91, 129.98, 129.93, 129.70, 129.35, 129.22,

129.16, 128.20, 127.13, 126.35, 126.10, 124.32, 123.73, 123.67, 120.77, 120.50, 120.29, 57.51, 25.17, 11.54. MS (ESI):  $m/z$  470.073  $[M+H]^+$  (calculated 470.076).

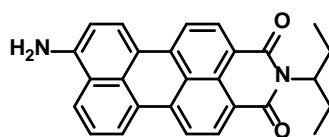

**H<sub>2</sub>N-PMI-C<sub>5</sub> (3)**

**H<sub>2</sub>N-PMI-C<sub>5</sub> (3).** **Br-PMI-C<sub>5</sub> (2)** (400 mg, 0.851 mmol) was combined with sodium azide (1.66 g, 25.5 mmol) in 10 mL *N,N*-dimethylacetamide (DMA) that had been dried with activated alumina. The solution was heated at 105 °C under N<sub>2</sub> for 5 h, and the cooled product was extracted into CH<sub>2</sub>Cl<sub>2</sub> and washed with water (3 x 20 mL) to remove most of the DMA. The solvent was removed under vacuum and the crude product was purified on a silica column with 50:1 CH<sub>2</sub>Cl<sub>2</sub>/acetone as the eluent, affording a deep purple solid. Yield: 199 mg (0.490 mmol, 57%). <sup>1</sup>H NMR (500 MHz, CDCl<sub>3</sub>) δ 8.48 (m, 2H), 8.41 (d,  $J$  = 7.4 Hz, 1H), 8.29 (d,  $J$  = 7.9 Hz, 1H), 8.22 (d,  $J$  = 8.2 Hz, 1H), 8.12 (d,  $J$  = 8.0 Hz, 1H), 7.82 (d,  $J$  = 8.1 Hz, 1H), 7.56 (t,  $J$  = 7.6 Hz, 1H), 6.86 (d,  $J$  = 7.7 Hz, 1H), 5.10 (m, 1H), 4.62 (s, 2H), 2.28 (m, 2H), 1.94 (m, 2H), 0.92 (t,  $J$  = 7.4 Hz, 6H). <sup>13</sup>C NMR (125 MHz, CDCl<sub>3</sub>) δ 162.85, 145.76, 138.33, 137.43, 130.44, 129.88, 128.91, 126.32, 126.12, 125.83, 124.42, 123.50, 123.21, 120.04, 119.55, 117.89, 111.08, 57.25, 25.20, 11.56. MS (ESI):  $m/z$  407.174  $[M+H]^+$  (calculated 407.176).

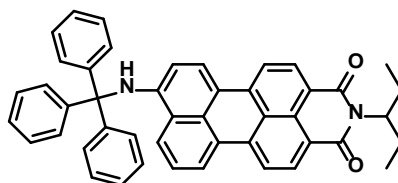

**trityl-NH-PMI-C<sub>5</sub> (4)**

**trityl-NH-PMI-C<sub>5</sub> (4).** **H<sub>2</sub>N-PMI-C<sub>5</sub> (3)** (460 mg, 1.31 mmol) was combined with trityl chloride (694 mg, 2.49 mmol), and 4-(dimethylamino)pyridine (14 mg, 0.11 mmol) in 30 mL

CH<sub>2</sub>Cl<sub>2</sub> and stirred in an ice bath. Triethylamine (TEA) (0.31 mL, 2.2 mmol) was added dropwise, and the mixture was stirred at 0 °C for 1.5 h. The solvent was removed under vacuum, and the crude product was purified on a silica column deactivated with 2% TEA with CH<sub>2</sub>Cl<sub>2</sub> as the eluent, yielding a deep blue solid. Yield: 648 mg (1.00 mmol, 88%). <sup>1</sup>H NMR (500 MHz, CDCl<sub>3</sub>) δ 8.43 (d, *J* = 7.8 Hz, 1H), 8.35 (d, *J* = 7.6 Hz, 1H), 8.20 (d, *J* = 8.2 Hz, 1H), 8.17 (d, *J* = 8.1 Hz, 1H), 7.94 (d, *J* = 8.4 Hz, 1H), 7.67 (d, *J* = 8.0 Hz, 1H), 7.61 (d, *J* = 8.5 Hz, 1H), 7.57 (t, *J* = 8.0 Hz, 1H), 7.45 (m, 6H), 7.34 (m, 6H), 7.30 (m, 3H), 6.35 (s, 1H), 6.21 (d, *J* = 8.6 Hz, 1H), 5.07 (tt, *J* = 9.5, 5.9 Hz, 1H), 2.27 (m, 2H), 1.92 (m, 2H), 0.92 (t, *J* = 7.4 Hz, 6H). <sup>13</sup>C NMR (125 MHz, CDCl<sub>3</sub>) δ 146.96, 144.62, 144.09, 138.19, 137.26, 130.22, 129.98, 129.14, 128.69, 128.50, 128.06, 128.04, 127.55, 127.39, 126.00, 125.80, 125.51, 123.96, 123.70, 122.31, 119.25, 118.33, 117.46, 111.89, 72.05, 57.15, 25.17, 11.58. MS (ESI): *m/z* 648.277 M<sup>+</sup> (calculated 648.278).

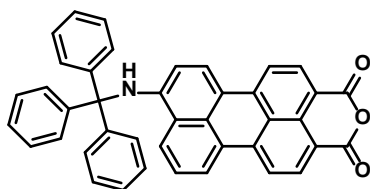

**trityl-NH-PMI-C<sub>5</sub> (5)**

**trityl-NH-PMA (5).** **trityl-NH-PMI-C<sub>5</sub> (4)** (310 mg, 0.478 mmol) was combined with 2.21 g 85% KOH (33.4 mmol) in 15 mL *t*-BuOH and heated to reflux (105 °C) under N<sub>2</sub> for 41 h. The orange-brown solution was cooled slightly and 5 mL acetic acid was added, which accomplished the ring-closing to the anhydride and resulted in a thick blue-purple suspension. The product was extracted into CH<sub>2</sub>Cl<sub>2</sub> and washed with water (3 x 25 mL), followed by column chromatography on silica deactivated with 1% TEA (eluent gradient: CH<sub>2</sub>Cl<sub>2</sub> to 99:1 CH<sub>2</sub>Cl<sub>2</sub>/acetone), affording a blue solid. Yield: 128 mg (0.221 mmol, 46%). <sup>1</sup>H NMR (500 MHz, CDCl<sub>3</sub>) δ 8.46 (d, *J* = 7.5 Hz, 1H), 8.43 (d, *J* = 8.2 Hz, 1H), 8.25 (d, *J* = 2.4 Hz, 1H), 8.23

(d,  $J = 2.5$  Hz, 1H), 8.02 (d,  $J = 8.3$  Hz, 1H), 7.81 (d,  $J = 2.8$  Hz, 1H), 7.79 (d,  $J = 3.3$  Hz, 1H), 7.65 (t,  $J = 8.0$  Hz, 1H), 7.42 (m, 6H), 7.36 (m, 6H), 7.31 (m, 3H), 6.49 (s, 1H), 6.27 (d,  $J = 8.7$  Hz, 1H).  $^{13}\text{C}$  NMR (125 MHz,  $\text{CDCl}_3$ )  $\delta$  161.49, 161.28, 145.29, 144.38, 140.31, 139.29, 133.78, 133.29, 129.50, 129.10, 128.86, 128.59, 128.08, 128.05, 127.68, 126.76, 126.48, 126.07, 125.12, 123.61, 123.38, 119.56, 117.73, 116.13, 113.21, 112.09, 72.23. MS (ESI):  $m/z$  580.188  $[\text{M}+\text{H}]^+$  (calculated 580.191).

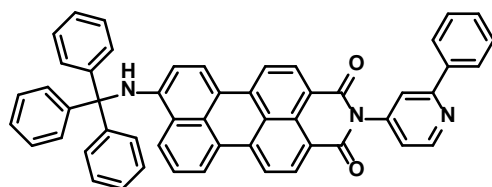

**trityl-NH-PMI-ppy (6)**

**trityl-NH-PMI-ppy (6).** **trityl-NH-PMA (5)** (200 mg, 0.345 mmol) was combined with **NH<sub>2</sub>-ppy** (835 mg, 4.91 mmol) in 10 mL dry pyridine, to which 5 mg  $\text{Zn}(\text{OAc})_2$  (0.03 mmol) was added, and the solution was heated at 135 °C for 42 hours. The solvent was removed under vacuum, and the crude product was purified on an alumina column with 9:1  $\text{CH}_2\text{Cl}_2$ /acetone as the eluent to yield a blue solid. Yield: 197 mg (0.269 mmol, 78%).  $^1\text{H}$  NMR (500 MHz,  $\text{CD}_2\text{Cl}_2$ )  $\delta$  8.85 (d,  $J = 5.1$  Hz, 1H), 8.40 (d,  $J = 8.0$  Hz, 1H), 8.34 (d,  $J = 7.6$  Hz, 1H), 8.14 (dd,  $J = 11.3, 8.1$  Hz, 2H), 8.06 (m, 2H), 8.01 (d,  $J = 8.4$  Hz, 1H), 7.80 (d,  $J = 1.7$  Hz, 1H), 7.61 (d,  $J = 8.4$  Hz, 2H), 7.57 (t,  $J = 8.0$  Hz, 1H), 7.48 (m, 6H), 7.43 (m, 2H), 7.35 (m, 6H), 7.32 (m, 3H), 7.29 (m, 2H), 6.48 (s, 1H), 6.25 (d,  $J = 8.6$  Hz, 1H).  $^{13}\text{C}$  NMR (125 MHz,  $\text{CD}_2\text{Cl}_2$ )  $\delta$  163.85, 163.72, 159.19, 151.17, 145.52, 145.09, 145.00, 139.40, 139.31, 138.55, 132.11, 131.67, 130.85, 129.90, 129.69, 129.52, 129.21, 128.87, 127.96, 127.48, 126.52, 126.40, 126.24, 125.00, 124.03, 123.40, 123.15, 121.53, 120.32, 119.76, 118.38, 117.86, 117.76, 112.43, 72.54. MS (ESI):  $m/z$  732.265  $[\text{M}+\text{H}]^+$  (calculated 732.265).

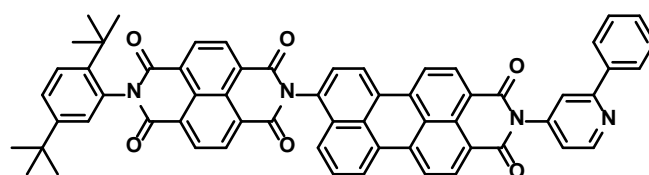

**NDI-PMI-ppy (8)**

**NDI-PMI-ppy (8).** trityl-NH-PMA (5) (100 mg, 0.137 mmol) was dissolved in 10 mL  $\text{CH}_2\text{Cl}_2$ , and a solution of trifluoroacetic acid (0.31 mL, 4.0 mmol) in 10 mL  $\text{CH}_2\text{Cl}_2$  was added slowly while stirring at room temperature. After 20 min, the solvent was blown off with  $\text{N}_2$  to yield the trityl-deprotected compound. To the same flask were added 1.56 g NIA (3.42 mmol), 10 mL dry pyridine, and 5 mg  $\text{Zn}(\text{OAc})_2$  (0.03 mmol), and the mixture was stirred under  $\text{N}_2$  at 135 °C for 24 h. The solvent was removed under vacuum, and the crude product was dissolved in  $\text{CH}_2\text{Cl}_2$  and washed with 1M HCl (3 x 20 mL). The compound was purified on an alumina column with 24:1  $\text{CHCl}_3$ /acetone, followed by a silica column with 47:3  $\text{CH}_2\text{Cl}_2$ /acetone as the eluent, yielding a deep red solid. Yield: 113 mg (0.122 mmol, 89%).  $^1\text{H}$  NMR (500 MHz,  $\text{CD}_2\text{Cl}_2$ )  $\delta$  8.91 (d,  $J$  = 5.0 Hz, 1H), 8.86 (d,  $J$  = 5.4 Hz, 4H), 8.33 (dd,  $J$  = 16.6, 7.8 Hz, 1H), 8.29 (dd,  $J$  = 7.9, 3.4 Hz, 1H), 8.24 (dd,  $J$  = 8.2, 4.4 Hz, 1H), 8.11 (dd,  $J$  = 15.7, 7.3 Hz, 1H), 8.08 (d,  $J$  = 8.0 Hz, 2H), 7.99 (dd,  $J$  = 24.0, 8.0 Hz, 1H), 7.94 (t,  $J$  = 3.7 Hz, 2H), 7.64 (m, 3H), 7.55 (dd,  $J$  = 8.5, 2.2 Hz, 1H), 7.49 (t,  $J$  = 7.5, 1H), 7.42 (m, 3H), 7.35 (m, 1H), 7.08 (d,  $J$  = 2.1 Hz, 1H), 1.36 (s, 9H), 1.30 (d,  $J$  = 3.8 Hz, 9H).  $^{13}\text{C}$  NMR (125 MHz,  $\text{CDCl}_3$ )  $\delta$  163.81, 163.80, 163.19, 159.33, 151.06, 150.63, 144.22, 143.77, 138.93, 137.00, 136.97, 136.56, 136.54, 134.11, 134.07, 132.00, 131.87, 131.73, 130.98, 130.93, 130.50, 129.78, 129.75, 129.58, 129.56, 129.34, 129.27, 129.24, 128.83, 128.59, 128.52, 128.34, 128.24, 127.71, 127.59, 127.54, 127.24, 126.99,

126.71, 126.32, 126.31, 124.67, 124.51, 124.46, 123.90, 123.87, 122.48, 121.25, 121.06, 120.95, 120.81, 35.75, 34.47, 31.92, 31.36. MS (ESI):  $m/z$  927.318  $[M+H]^+$  (calculated 927.318).

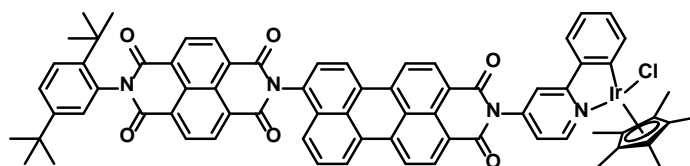

**NDI-PMI-Ir catalyst (9)**

**NDI-PMI-Ir catalyst (9).** NDI-PMI-ppy ligand (**8**) (75 mg, 0.081 mmol) was dissolved in 12 mL  $N_2$ -sparged  $CH_2Cl_2$ , to which  $[Cp^*IrCl_2]_2$  (32 mg, 0.40 mmol) and  $NaOAc \cdot 3H_2O$  (22 mg, 0.16 mmol) were added. The mixture was stirred at 35 °C under  $N_2$  for 9 h, and the product was filtered twice through celite with  $CH_2Cl_2$  and the solvent removed under vacuum to afford a deep red solid. Yield: 106 mg (0.082 mmol, quantitative).  $^1H$  NMR (500 MHz,  $CD_2Cl_2$ )  $\delta$  8.90 (d,  $J$  = 1.1 Hz, 4H), 8.87 (d,  $J$  = 6.0 Hz, 1H), 8.65 (m, 2H), 8.62 (d,  $J$  = 8.5 Hz, 1H), 8.52 (d,  $J$  = 7.3 Hz, 1H), 8.48 (d,  $J$  = 8.1 Hz, 2H), 7.93 (d,  $J$  = 2.1 Hz, 1H), 7.85 (dd,  $J$  = 7.7, 1.2 Hz, 1H), 7.74 (m, 3H), 7.66 (m, 2H), 7.55 (dd,  $J$  = 8.6, 2.2 Hz, 1H), 7.25 (dd,  $J$  = 6.1, 2.2 Hz, 1H), 7.22 (t,  $J$  = 7.3, 1H), 7.08 (dd,  $J$  = 2.2, 1.4 Hz, 1H), 7.04 (t,  $J$  = 7.5 Hz, 1H), 1.73 (s, 15H), 1.35 (d,  $J$  = 1.6 Hz, 9H), 1.29 (d,  $J$  = 4.0 Hz, 9H).  $^{13}C$  NMR (125 MHz,  $CD_2Cl_2$ )  $\delta$  169.08, 164.42, 164.38, 163.64, 163.45, 152.52, 151.16, 145.10, 144.84, 144.67, 144.64, 137.50, 137.07, 137.04, 136.38, 134.87, 133.06, 132.25, 132.15, 132.10, 132.03, 131.38, 131.35, 131.27, 130.70, 130.09, 129.88, 129.64, 129.05, 129.03, 128.99, 128.88, 128.85, 128.16, 127.99, 127.96, 127.93, 127.28, 127.08, 126.78, 125.28, 125.21, 125.13, 125.08, 124.83, 124.45, 123.65, 122.53, 121.62, 121.56, 121.24, 121.08, 120.28, 89.40, 36.04, 34.77, 32.02, 31.48, 9.31. MS (ESI):  $m/z$  1253.384  $[M-Cl]^+$  (calculated 1253.383).



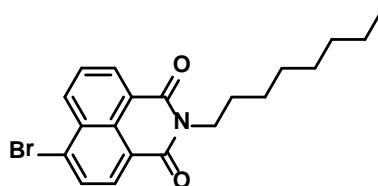

**Br-NMI-C<sub>8</sub>**

***N*-(*n*-octyl)-4-bromo-naphthalene-1,8-dicarboximide (Br-NMI-C<sub>8</sub>).** 4-bromo-1,8-naphthalic anhydride (2.00 g, 7.22 mmol) and octylamine (7.1 mL, 43 mmol) were combined in 70 mL glacial acetic acid and stirred at 125 °C for 26 h. 70 mL water was added to precipitate the product, which was vacuum filtered and purified on a silica column with 4:1 CH<sub>2</sub>Cl<sub>2</sub>/hexanes as the eluent, yielding a white solid. Yield: 375 mg (5.70 mmol, 79%). <sup>1</sup>H NMR (500 MHz, CDCl<sub>3</sub>) δ 8.64 (d, *J* = 7.2 Hz, 1H), 8.54 (d, *J* = 8.4 Hz, 1H), 8.39 (dd, *J* = 8.0, 1H), 8.02 (d, *J* = 7.8 Hz, 1H), 7.83 (t, *J* = 7.9 Hz, 1H), 4.15 (t, *J* = 7.5 Hz, 2H), 1.71 (p, *J* = 7.5 Hz, 2H), 1.40 (m, 2H), 1.34 (m, 2H), 1.26 (m, 6H), 0.86 (t, *J* = 6.8 Hz, 3H). <sup>13</sup>C NMR (125 MHz, CDCl<sub>3</sub>) δ 163.72, 163.69, 133.31, 132.12, 131.31, 131.19, 130.70, 130.30, 129.08, 128.18, 123.25, 122.39, 40.77, 31.95, 29.47, 29.36, 28.22, 27.27, 22.78, 14.25. MS (ESI): *m/z* 388.090 [M+H]<sup>+</sup> (calculated 388.091).

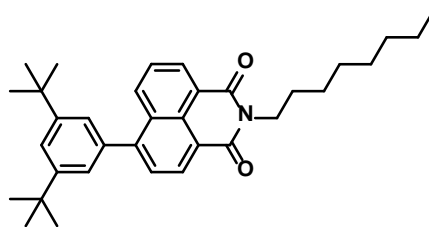

**(di-*t*-butyl)ph-NMI-C<sub>8</sub>**

***N*-(*n*-octyl)-4-[3,5-di-*tert*-butylphenyl]-naphthalene-1,8-dicarboximide [(di-*t*-butyl)ph-NMI-C<sub>8</sub>].** To 120 mL N<sub>2</sub>-purged tetrahydrofuran were added **Br-NMI-C<sub>8</sub>** (1.25 g, 3.22 mmol) and 3,5-di-*tert*-butylphenylboronic acid (2.72 g, 11.6 mmol), and the mixture was heated to 50 °C. 370 mg Pd(PPh<sub>3</sub>)<sub>4</sub> (0.320 mmol, 10 mol %) was added under N<sub>2</sub> along with 40 mL

deoxygenated  $\text{Na}_2\text{CO}_3$  (1.6 M), and the mixture was stirred at 70 °C for 14 h. The crude product was extracted into  $\text{CH}_2\text{Cl}_2$ , and the solvent was removed under vacuum and the product purified on a silica column with 7:3  $\text{CH}_2\text{Cl}_2$ /hexanes as the eluent, affording an off-white solid. Yield: 1.18 g (2.37 mmol, 74%).  $^1\text{H}$  NMR (500 MHz,  $\text{CDCl}_3$ )  $\delta$  8.65 (d,  $J$  = 7.7 Hz, 1H), 8.63 (dd,  $J$  = 7.5, 1.0 Hz, 1H), 8.30 (dd,  $J$  = 8.5, 1.0 Hz, 1H), 7.73 (d,  $J$  = 7.5 Hz, 1H), 7.71 (dd,  $J$  = 7.5 Hz, 8.5 Hz, 1H), 7.57 (t,  $J$  = 1.8 Hz, 1H), 7.33 (d,  $J$  = 1.8 Hz, 2H), 4.21 (t,  $J$  = 8.0 Hz, 2H), 1.75 (p,  $J$  = 7.5 Hz, 2H), 1.44 (m, 2H), 1.40 (s, 18H), 1.28 (m, 8H), 0.87 (t,  $J$  = 7.0 Hz, 3H).  $^{13}\text{C}$  NMR (125 MHz,  $\text{CDCl}_3$ )  $\delta$  164.56, 164.36, 151.27, 148.24, 138.15, 133.02, 131.23, 130.99, 130.38, 128.87, 127.99, 126.81, 124.42, 123.01, 122.52, 121.58, 40.66, 35.17, 31.98, 31.65, 29.53, 29.40, 28.30, 27.32, 22.80, 14.27. MS (ESI):  $m/z$  498.336  $[\text{M}+\text{H}]^+$  (calculated 498.337).

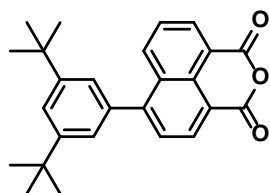

**(di-*t*-butyl)ph-NMA**

**4-[3,5-di-*tert*-butylphenyl]-1,8-naphthalic anhydride [(di-*t*-butyl)ph-NMA].** (di-*t*-butyl)ph-NMI- $\text{C}_8$  (925 mg, 1.86 mmol) and 2.45 g 85% KOH (37.1 mmol) were combined in 23 mL *t*-BuOH, and the mixture was heated at 100 °C for 1 h. The mixture was acidified with 12 mL glacial acetic acid, and the product was extracted into  $\text{CH}_2\text{Cl}_2$  and washed with water (3 x 25 mL). Solvent was evaporated under vacuum and the crude product was purified on a silica column with  $\text{CH}_2\text{Cl}_2$  as the eluent, giving a white solid. Yield: 716 mg (1.85 mmol, 99%).  $^1\text{H}$  NMR (500 MHz,  $\text{CDCl}_3$ )  $\delta$  8.67 (dd,  $J$  = 8.5, 7.3 Hz, 2H), 8.41 (d,  $J$  = 8.6 Hz, 1H), 7.78 (m, 2H), 7.59 (d,  $J$  = 1.9 Hz, 1H), 7.32 (d,  $J$  = 1.7 Hz, 2H), 1.40 (s, 18H).  $^{13}\text{C}$  NMR (125 MHz,  $\text{CDCl}_3$ )  $\delta$  161.09, 160.85, 151.55, 150.03, 137.46, 134.64, 133.49, 133.25, 131.12, 130.68,

128.50, 127.31, 124.27, 123.02, 119.05, 117.42, 35.20, 31.63. MS (ESI):  $m/z$  387.194  $[M+H]^+$  (calculated 387.196).

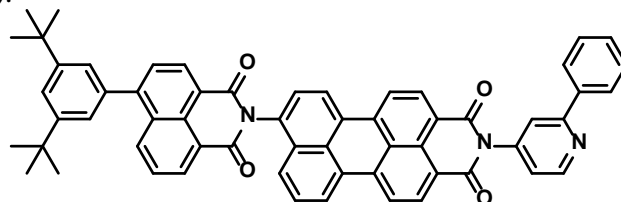

**NMI-PMI-ppy (10)**

**NMI-PMI-ppy (10).** **trityl-NH-PMA (5)** (30 mg, 0.041 mmol) was dissolved in 5 mL  $CH_2Cl_2$ , and a solution of trifluoroacetic acid (0.047 mL, 0.61 mmol) in 5 mL  $CH_2Cl_2$  was added slowly while stirring at room temperature. After 1 h, the solvent was blown off with  $N_2$  to yield the trityl-deprotected compound. To the same flask were added 79 mg (**di-*t*-butyl**)**ph-NMA** (0.20 mmol), 4 g imidazole, and 5 mg  $Zn(OAc)_2$  (0.03 mmol), and the mixture was stirred under  $N_2$  at 155 °C for 17 h. The product was extracted into  $CH_2Cl_2$  and washed with 1 M HCl (3 x 25 mL) to remove the imidazole. The compound was first purified on silica column with 19:1  $CH_2Cl_2$  acetone as the eluent, followed by an alumina column with 97:3  $CHCl_3$ /acetone as the eluent, yielding a deep red solid. Yield: 34 mg (0.040 mmol, 98%).  $^1H$  NMR (500 MHz,  $CDCl_3$ )  $\delta$  8.94 (d,  $J$  = 5.1 Hz, 1H), 8.76 (d,  $J$  = 7.5 Hz, 1H), 8.74 (dd,  $J$  = 7.1, 1.2 Hz, 1H), 8.49 (d,  $J$  = 7.9 Hz, 1H), 8.44 (m, 2H), 8.38 (d,  $J$  = 8.1 Hz, 1H), 8.26 (d,  $J$  = 7.4 Hz, 1H), 8.19 (d,  $J$  = 8.2 Hz, 1H), 8.14 (d,  $J$  = 8.1 Hz, 1H), 8.06 (m, 2H), 7.87 (d,  $J$  = 1.8 Hz, 1H), 7.83 (d,  $J$  = 7.5 Hz, 1H), 7.79 (dd,  $J$  = 8.7, 7.1 Hz, 1H), 7.70 (d,  $J$  = 8.2 Hz, 1H), 7.64 (d,  $J$  = 7.9 Hz, 1H), 7.61 (t,  $J$  = 1.8 Hz, 1H), 7.52 (m, 1H), 7.45 (m, 2H), 7.40 (m, 4H), 1.42 (s, 18H).  $^{13}C$  NMR (125 MHz,  $CDCl_3$ )  $\delta$  164.74, 164.52, 163.36, 163.32, 159.38, 151.47, 151.04, 149.35, 144.35, 139.01, 137.94, 137.41, 137.05, 135.35, 134.06, 132.11, 131.96, 131.93, 131.85, 131.25, 130.77, 130.04, 129.74, 129.62, 129.59, 129.29, 128.87, 128.84, 128.47, 128.38, 128.29, 127.29, 127.10, 126.44,

125.26, 124.52, 124.41, 124.19, 122.84, 122.76, 122.52, 121.35, 121.26, 120.95, 120.83, 120.70, 120.63, 35.22, 31.67. MS (ESI):  $m/z$  858.332  $[M+H]^+$  (calculated 858.333).

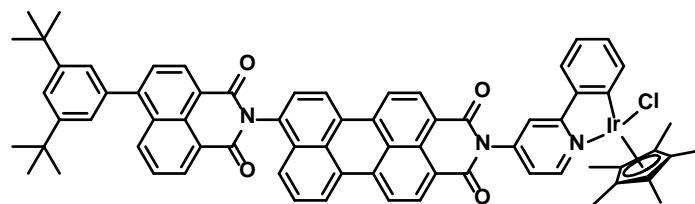

**NMI-PMI-Ir catalyst (11)**

**NMI-PMI-Ir catalyst (11).** NMI-PMI-ppy ligand (**10**) (25 mg, 0.029 mmol) was dissolved in 7 mL  $N_2$ -sparged  $CH_2Cl_2$ , to which  $[Cp^*IrCl_2]_2$  (12 mg, 0.015 mmol) and  $NaOAc \cdot 3H_2O$  (7.9 mg, 0.058 mmol) were added. The mixture was stirred at 35 °C under  $N_2$  for 23 h, and the product was filtered twice through celite with  $CH_2Cl_2$  and the solvent removed under vacuum to afford a deep red solid. Yield: 36 mg (0.030 mmol, quantitative).  $^1H$  NMR (500 MHz,  $CD_2Cl_2$ )  $\delta$  8.89 (d,  $J$  = 6.1 Hz, 1H), 8.73 (m, 2H), 8.48 (d,  $J$  = 7.9 Hz, 1H), 8.44 (m, 2H), 8.38 (d,  $J$  = 8.0 Hz, 1H), 8.28 (d,  $J$  = 7.6 Hz, 1H), 8.19 (d,  $J$  = 8.1 Hz, 1H), 8.12 (d,  $J$  = 8.1 Hz, 1H), 8.03 (d,  $J$  = 2.2 Hz, 1H), 7.83 (m, 3H), 7.78 (d,  $J$  = 7.5 Hz, 1H), 7.73 (d,  $J$  = 8.4 Hz, 1H), 7.67 (d,  $J$  = 7.9 Hz, 1H), 7.63 (t,  $J$  = 1.8 Hz, 1H), 7.55 (t,  $J$  = 7.9 Hz, 1H), 7.42 (d,  $J$  = 1.9 Hz, 2H), 7.35 (dd,  $J$  = 6.0, 2.0 Hz, 1H), 7.21 (t,  $J$  = 7.5 Hz, 1H), 7.02 (t,  $J$  = 7.5 Hz, 1H), 1.73 (s, 15H), 1.42 (s, 18H).  $^{13}C$  NMR (125 MHz,  $CD_2Cl_2$ )  $\delta$  169.05, 165.05, 164.84, 164.39, 163.52, 153.82, 152.52, 151.87, 149.58, 145.20, 144.83, 138.43, 137.82, 137.43, 136.33, 136.08, 134.27, 132.18, 132.14, 131.89, 131.63, 131.30, 131.13, 130.24, 129.97, 129.95, 129.03, 128.98, 128.79, 128.67, 127.52, 126.83, 125.98, 125.76, 125.15, 124.86, 124.82, 124.71, 123.70, 123.32, 123.22, 122.57, 121.84, 121.49, 121.44, 121.02, 120.93, 120.31, 89.36, 35.49, 31.76, 9.30. MS (ESI):  $m/z$  1184.399  $[M-Cl]^+$  (calculated 1184.398).

## II. Figures

### A. Steady-state spectroscopy

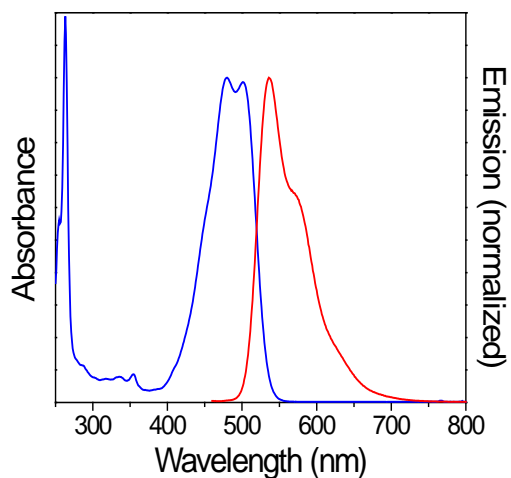

**Figure S1.** Steady-state absorption (blue) and emission (red) spectra of **PMI-C<sub>5</sub> (1)** in CH<sub>2</sub>Cl<sub>2</sub>.

### B. Spectroelectrochemistry

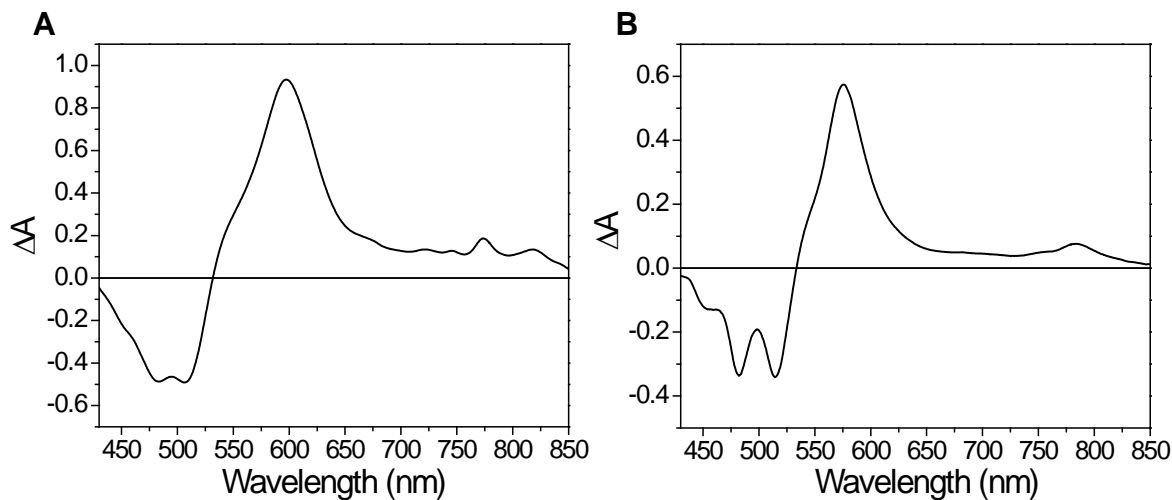

**Figure S2.** (A) Spectroelectrochemical difference spectrum of radical anion of **PMI-C<sub>5</sub> (1)** (potential of -1.6 V applied, initial ground state absorption spectrum subtracted). (B) Spectroelectrochemical difference spectrum of radical cation of **PMI-C<sub>5</sub> (1)** (potential of +1.3 V applied, initial ground state absorption spectrum subtracted). Both spectra acquired in benzonitrile (0.1 M TBAPF<sub>6</sub>).

### C. Transient absorption spectroscopy

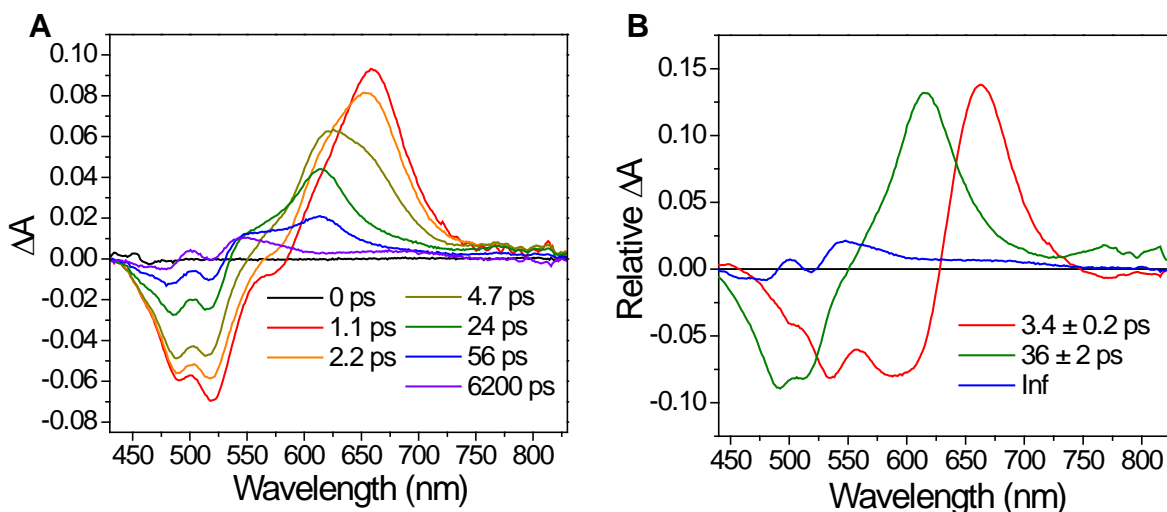

**Figure S3.** (A) Femtosecond transient absorption spectra of NMI-PMI-Ir catalyst (**11**) in PhCN following 150 fs, 500 nm laser pulse excitation. (B) Spectra associated with the kinetic components obtained by global analysis of the transient absorption spectra of **11** in PhCN.

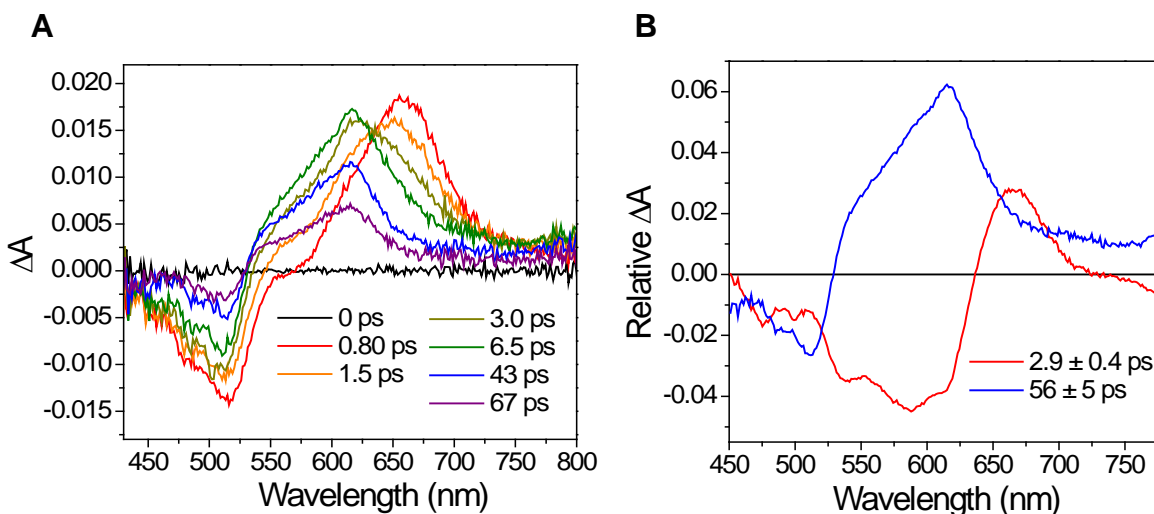

**Figure S4.** (A) Femtosecond transient absorption spectra of NDI-PMI-ppy ligand (**8**) in PhCN following 150 fs, 500 nm laser pulse excitation. (B) Spectra associated with the kinetic components obtained by global analysis of the transient absorption spectra of **8** in PhCN.

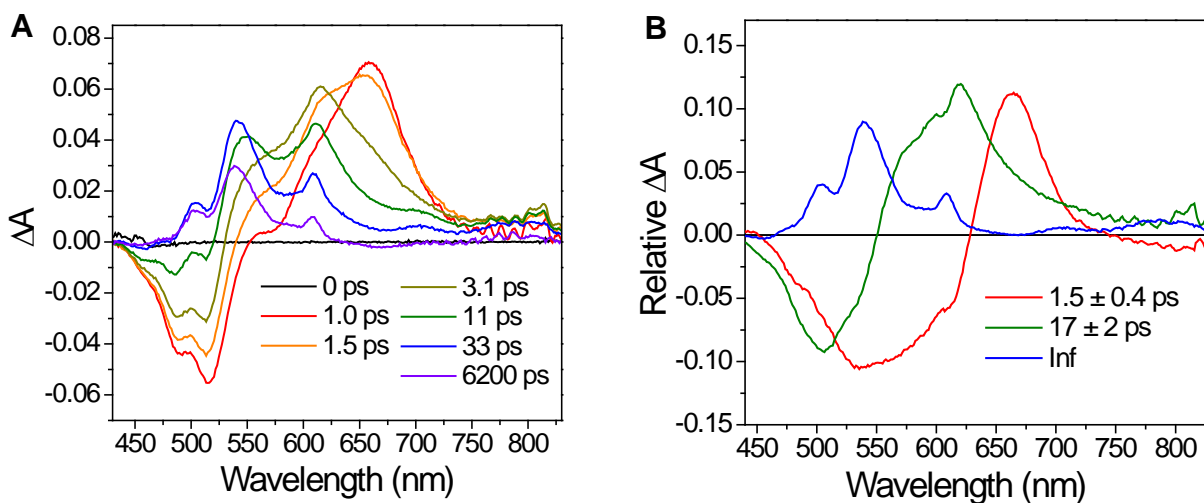

**Figure S5.** (A) Femtosecond transient absorption spectra of NDI-PMI-Ir catalyst triad (9) in PhCN following 150 fs, 500 nm laser pulse excitation. (B) Spectra associated with the kinetic components obtained by global analysis of the transient absorption spectra of 9 in PhCN.

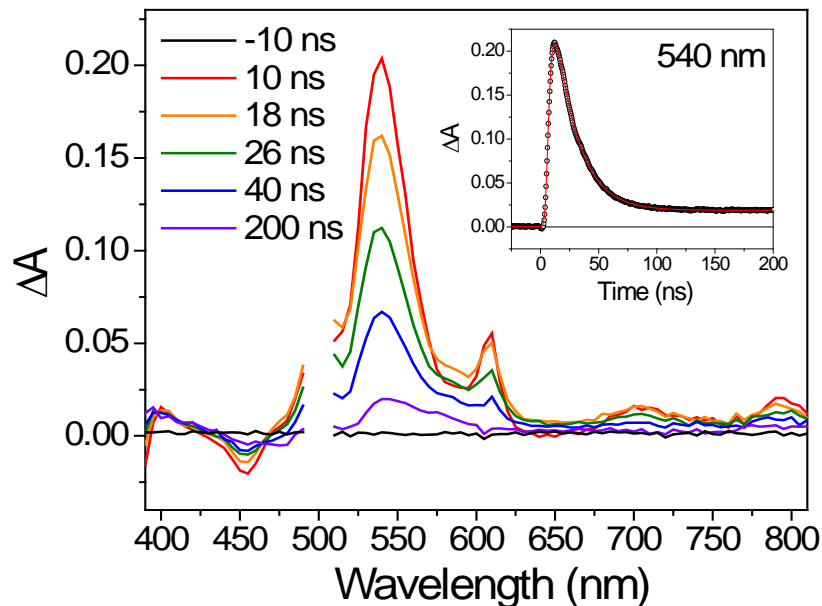

**Figure S6.** Nanosecond transient absorption spectra of NDI-PMI-Ir(III) catalyst (9) in PhCN following 150 fs, 500 nm laser pulse excitation. (Inset: transient absorption kinetic trace at 540 nm with least squares fit to the data shown.)

## D. Energy level diagram

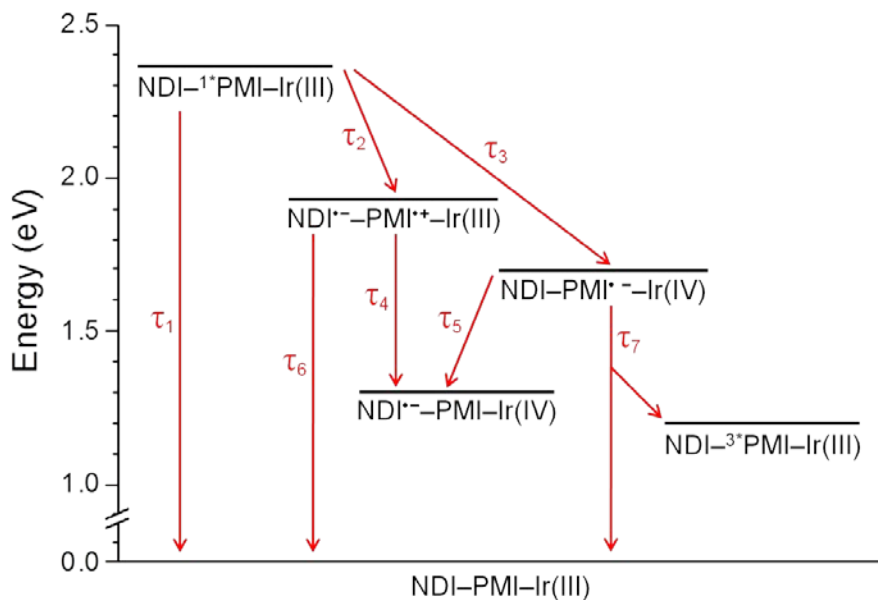

**Figure S7.** Energy level diagram for the NDI-PMI-Ir catalyst triad in PhCN, showing the photophysical pathways accessible from the PMI excited state.

## E. Time-resolved X-ray absorption

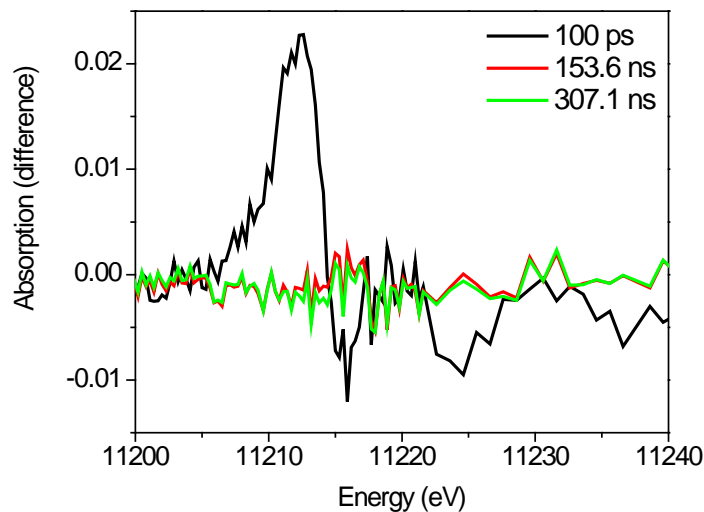

**Figure S8.** Difference spectra between ground state and photoexcited state at 100 ps (black), 153.6 ns (red), and 307.1 ns (green). Since  $\text{NDI}^{\bullet-}\text{-PMI-Ir(IV)}$  recombines to the Ir(III) state in  $\sim 20$  ns, there are no transient changes in later X-ray bunches, further confirming that changes seen in the 100 ps spectrum are real and are separate from the noise of the experiment.



### III. Supporting tables

**Table S1.** Ion-pair Distances and Energies for Electron Transfer Products in Triad **9** in PhCN

| Ion Pair                                      | $r_{\text{DA}}$ (Å) | $\Delta G_{\text{IP}}$ (eV) |
|-----------------------------------------------|---------------------|-----------------------------|
| NDI <sup>•-</sup> –PMI <sup>•+</sup> –Ir(III) | 8.7                 | 1.93                        |
| NDI–PMI <sup>•-</sup> –Ir(IV)                 | 12.0                | 1.67                        |
| NDI <sup>•-</sup> –PMI–Ir(IV)                 | 20.6                | 1.31                        |

**Table S2.** Timescales for Charge Separation ( $\tau_{\text{CS}}$ ), Charge Recombination ( $\tau_{\text{CR}}$ ), and Charge Shift ( $\tau_{\text{CSH}}$ ) in Compounds **8**, **9**, and **11** in PhCN, with Corresponding Timescales in Figure S7

| Compound                      | $\tau_{\text{CS}}$ (ps)            | $\tau_{\text{CSH}}$ (ps)        | $\tau_{\text{CR}}$ (ps) |
|-------------------------------|------------------------------------|---------------------------------|-------------------------|
| NDI–PMI–ppy ( <b>8</b> )      | $2.9 \pm 0.4$ ( $\tau_2$ )         | --                              | $56 \pm 5$ ( $\tau_6$ ) |
| NDI–PMI–Ir(III) ( <b>9</b> )  | $1.5 \pm 0.4$ ( $\tau_2, \tau_3$ ) | $17 \pm 2$ ( $\tau_4, \tau_5$ ) | $20800 \pm 100$         |
| NMI–PMI–Ir(III) ( <b>11</b> ) | $3.4 \pm 0.2$ ( $\tau_3$ )         | --                              | $36 \pm 2$ ( $\tau_7$ ) |

### IV. References

1. M. T. Vagnini, A. L. Smeigh, J. D. Blakemore, S. W. Eaton, N. D. Schley, F. D'Souza, R. H. Crabtree, G. W. Brudvig, D. T. Co and M. R. Wasielewski, *Proc. Natl. Acad. Sci. U. S. A.*, 2012, **109**, 15651-15656.
2. R. G. Ball, W. A. G. Graham, D. M. Heinekey, J. K. Hoyano, A. D. McMaster, B. M. Mattson and S. T. Michel, *Inorg. Chem.*, 1990, **29**, 2023-2025.
3. R. Carmieli, Q. X. Mi, A. B. Ricks, E. M. Giacobbe, S. M. Mickley and M. R. Wasielewski, *J. Am. Chem. Soc.*, 2009, **131**, 8372-8373.
4. D. P. Heller, D. R. Goldberg, H. Q. Wu and W. D. Wulff, *Can. J. Chem.*, 2006, **84**, 1487-1503.
